# Supplementary material for: Characterization of a recently detected halogenated aminorex derivative: para-fluoro-4-methylaminorex (4′F-4-MAR)
Source: Sci Rep. 2019 Jun 5;9:8314. doi: 10.1038/s41598-019-44830-y (PMC6549166; doi:10.1038/s41598-019-44830-y)
Supplement: Supplementary file 1 — Supplementary Information [file 41598_2019_44830_MOESM1_ESM.pdf]

## Supplementary Information

### **Characterization of a recently detected halogenated aminorex derivative: *para*-fluoro-4-methylaminorex (4'F-4-MAR).**

D. Fabregat-Safont<sup>1</sup>, X. Carbón<sup>2</sup>, M. Ventura<sup>2</sup>, I. Fornís<sup>2</sup>, F. Hernández<sup>1</sup>, M. Ibáñez<sup>1</sup>

<sup>1</sup> Research Institute for Pesticides and Water, University Jaume I, Avda. Sos Baynat s/n, 12071, Castelló de la Plana, Spain.

<sup>2</sup> Energy Control (Asociación Bienestar y Desarrollo), c/ Independencia 384, 08041, Barcelona, Spain.

Correspondence and request for materials should be addressed to M.I. (email: [ibanezm@uji.es](mailto:ibanezm@uji.es)).

## Methods

### *Reagents and chemicals*

For GC-MS analysis, GC-grade n-hexane and GC-grade acetone were purchased from Scharlau (Scharlab, Barcelona, Spain). For FTIR analysis, potassium bromide (KBr) was purchased from Scharlau.

### *Sample treatment*

For FTIR analysis, sample was prepared with 5% of the unknown compound and 95% of potassium bromide, homogenized in an agate mortar and compressed under a pressure of 5000 kg/cm<sup>2</sup>.

For GC-MS analysis, 10 mg of sample were extracted with 1 mL of acetone in an ultrasonic bath for 15 min. After centrifugation, the supernatant was five thousand-fold diluted with GC-grade n-hexane, and 1 µL of the extract were injected in the GC-MS system.

### *Instrumentation*

For FTIR analysis, a Jasco FT/IR-6200 FTIR spectrometer (Jasco Inc., Easton, MD, USA) was used. Data acquisition was performed at 23 °C between 4000 and 400 cm<sup>-1</sup>, with a resolution of 4 cm<sup>-1</sup> and performing 32 acquisitions.

For GC-MS analysis, an Agilent 6890N gas chromatograph (Agilent Technologies, Santa Clara, CA, USA) equipped with an Agilent 7683 autosampler (Agilent Technologies) was coupled to a Quattro Micro GC triple quadrupole mass spectrometer (Micromass, Boston, USA) using an electron ionization (EI) interface. The injector and the interface were operated at 250 °C. 1 µL of sample was injected in splitless

mode using deactivated liners into a 30 m 0.25 mm i.d., 0.25  $\mu$ m film thickness DB-5MS column (Agilent). Helium (99.999%, Praxair, Valencia, Spain) was used as carrier gas at a flow rate of 1 mL/min. The oven temperature was initially maintained at 90 °C for 1 min and programmed to reach 300 °C at 20 °C per min. It was finally maintained at 300 °C for 1.5 min (total run time was 12 min). The mass spectrometer was operated in electronic ionization mode at 70 eV. MS system worked in SCAN acquisition mode, acquiring from  $m/z$  50 to 400 Da. Analytical data were acquired and processed using MassLynx data station operation software (version 4.0, Waters).

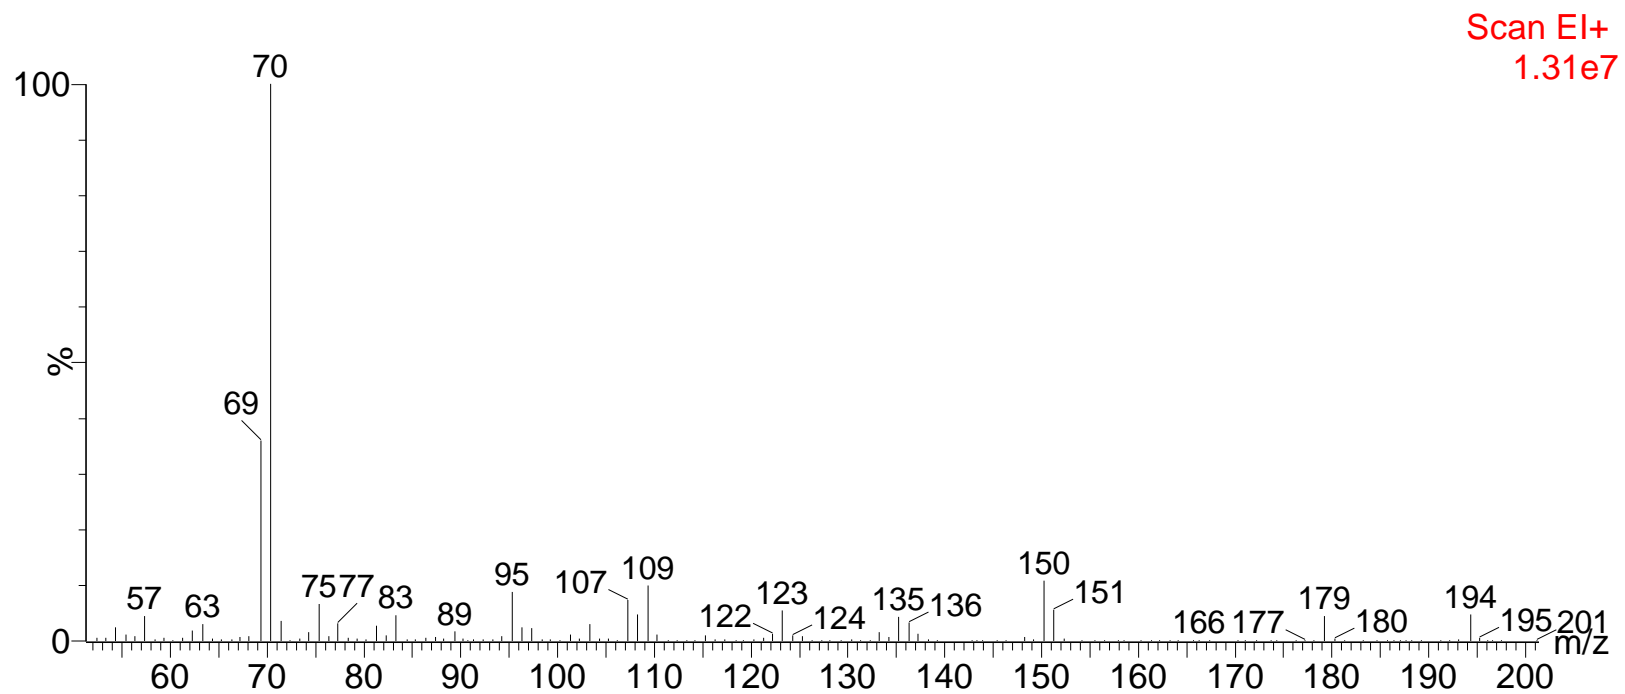

**Fig. S1.** GC-(EI)MS spectrum of the 4'-fluoro-4-MAR.

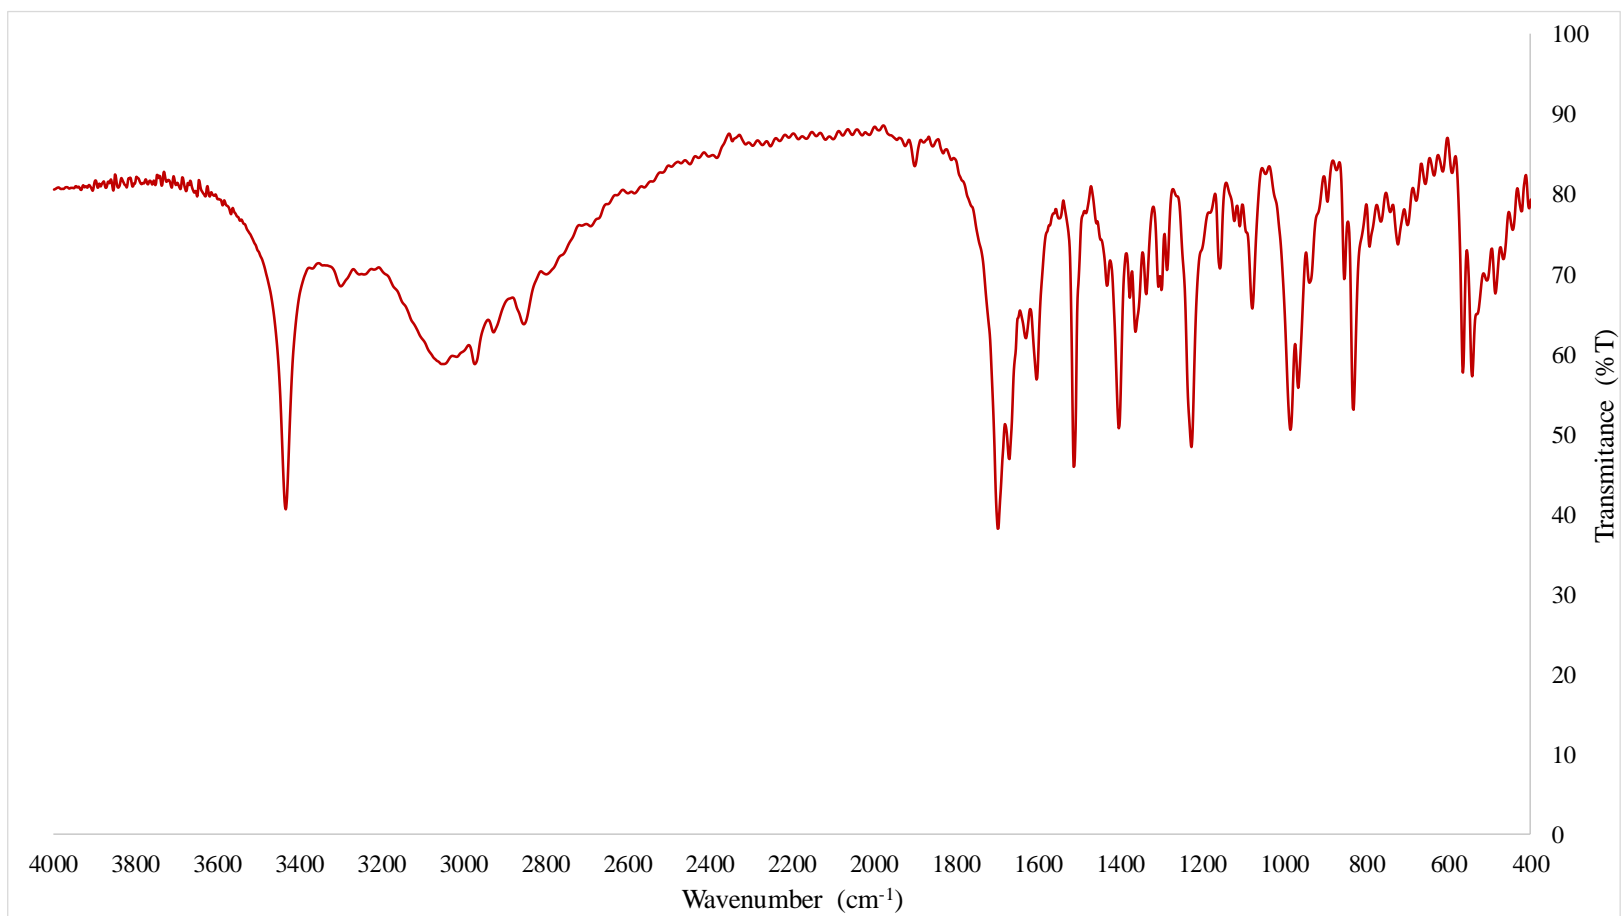

**Fig. S2.** FTIR spectrum of the 4'-fluoro-4-MAR.

4  
5  
6

EC-106

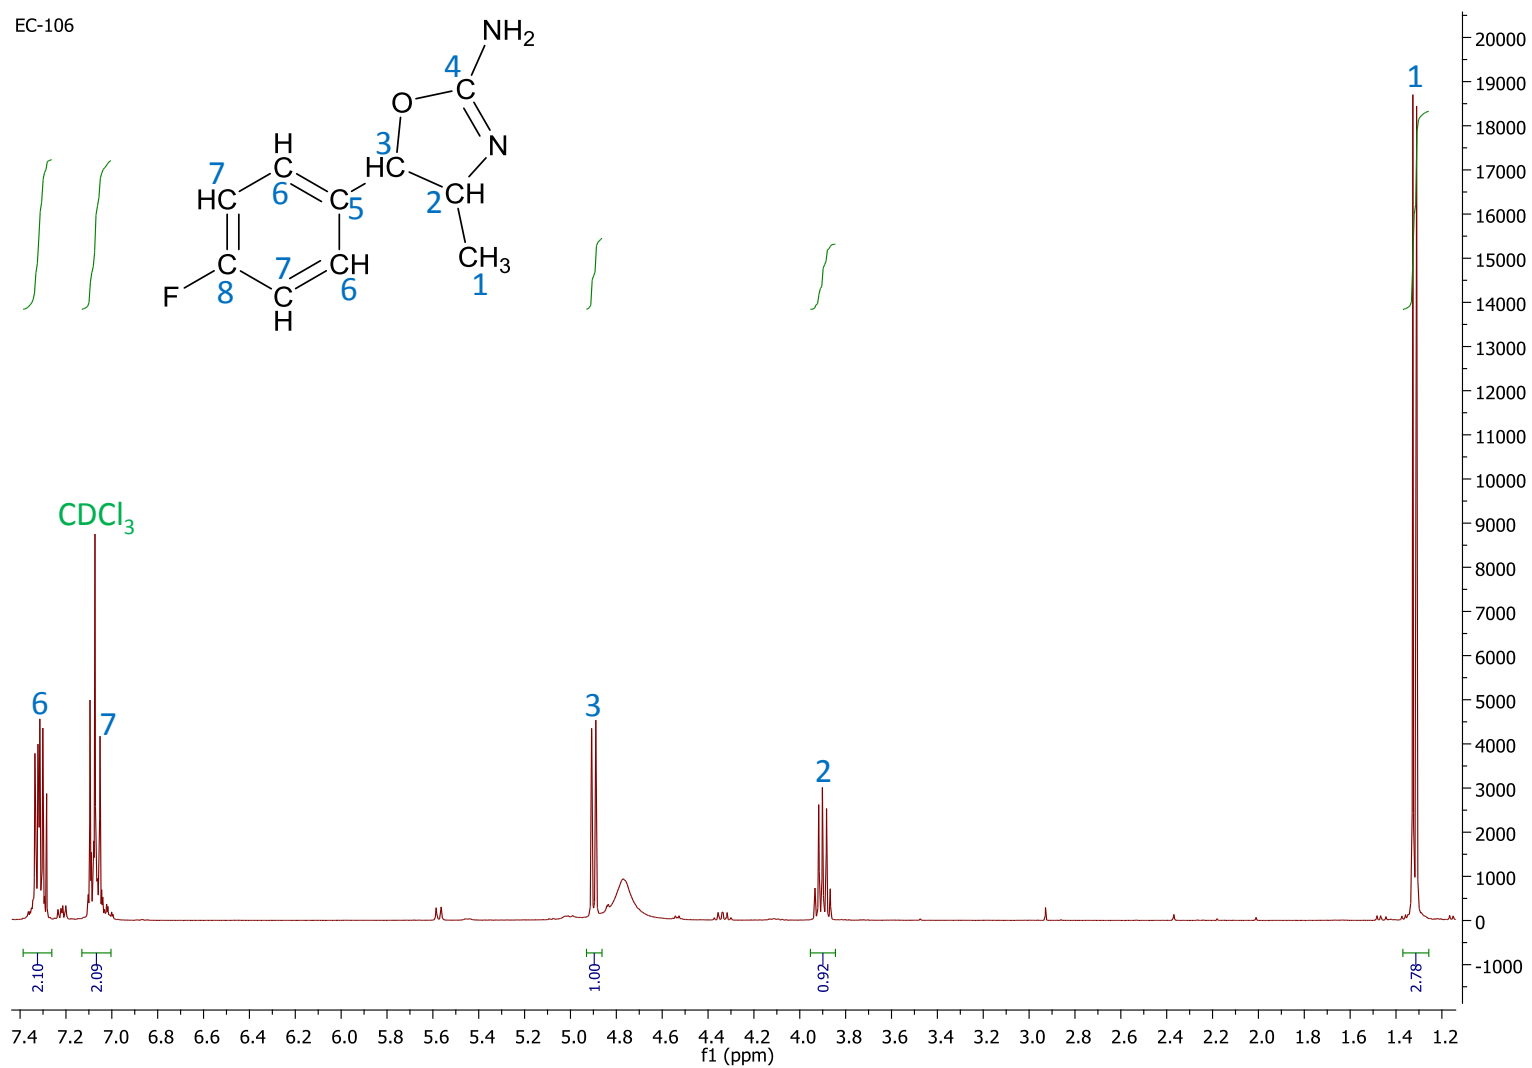

**Fig. S3.** <sup>1</sup>H NMR spectrum of the 4'-fluoro-4-MAR.

EC-106

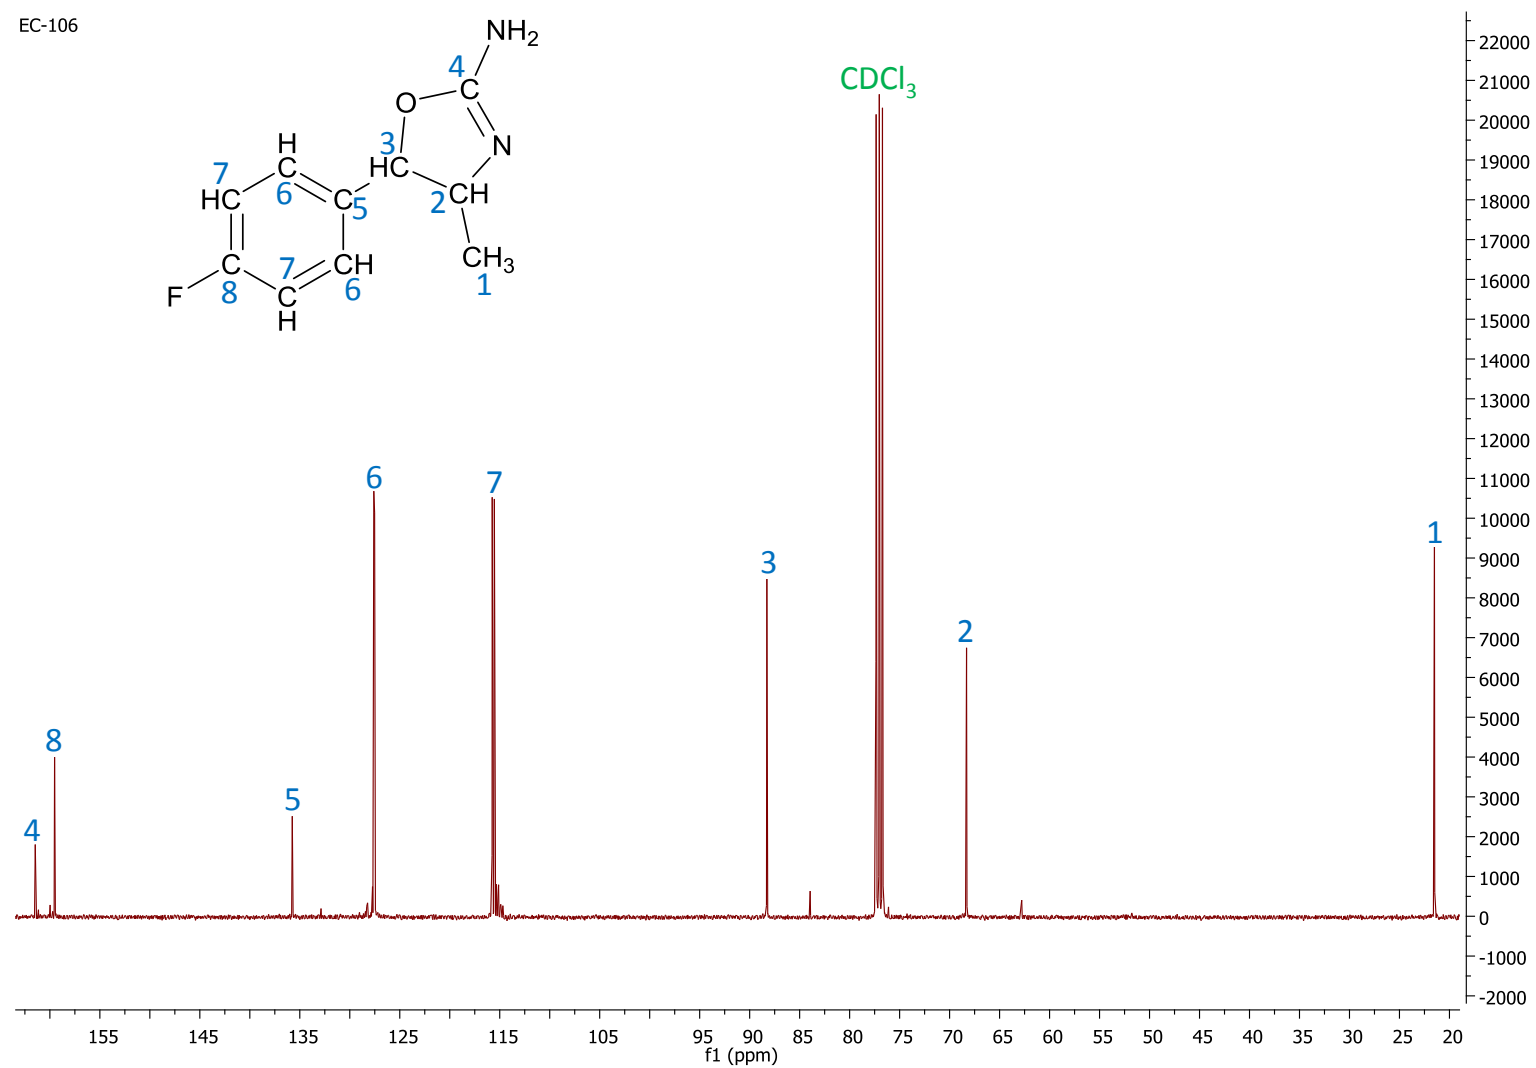

**Fig. S 4.**  $^{13}\text{C}$  NMR spectrum of the 4'-fluoro-4-MAR.
